# Supplementary material for: Alleloscope: Integrative single cell analysis of allele-specific copy number alterations and chromatin accessibility in cancer
Source: Research Square preprint supplement (doi:10.21203/rs.3.rs-98536/v1), 2020-11-04
Supplement: Supplementary file 1 [file f392f9ee7745291fc1866864.xlsx]

## Sheet: DE5vs6
peak_name

## Sheet: DE6vs5
peak_name

## Sheet: DE56vs4
peak_name

## Sheet: DE4vs56
peak_name

## Sheet: DE456vs3
peak_name

## Sheet: DE3vs456
peak_name

## Sheet: DE1vs2
peak_name

## Sheet: DE2vs1
peak_name

## Sheet: DE3456vs12
peak_name

## Sheet: DE12vs3456
peak_name
